# Supplementary material for: Associations of Novel Indices of Adiposity with Incident Heart Failure
Source: Research Square preprint supplement (doi:10.21203/rs.3.rs-731075/v1), 2021-07-19
Supplement: Supplementary file 1 [file 1477af2d47974a72b3e4f085.docx]

**Supplementary Table 1. Distribution of adiposity indices**

| **MEN** | **P (10)** | **P (25)** | **P (50)** | **P (75)** | **P (90)** | **Mean (SD)** |
| --- | --- | --- | --- | --- | --- | --- |
| BMI (kg.m-2) | 22.0 | 23.8 | 25.9 | 28.5 | 31.0 | 26.3 (3.6) |
| WC (m)*100 | 80.0 | 86.0 | 93.5 | 101.0 | 108.0 | 94.0 (11.0) |
| WHR | 0.85 | 0.89 | 0.94 | 0.99 | 1.03 | 0.94 (0.07) |
| BSI (m11/6.kg-2/3)*1000 | 73.6 | 76.2 | 79.4 | 82.4 | 85.3 | 79.4 (4.7) |
| WWI (m.kg-2)*100 | 9.3 | 9.7 | 10.2 | 10.7 | 11.2 | 10.2 (0.74) |
| BRI | 2.4 | 3.0 | 3.8 | 4.7 | 5.6 | 3.9 (1.3) |
| RFM | 18.9 | 22.3 | 25.7 | 28.7 | 31.2 | 25.3 (4.8) |
|  |  |  |  |  |  |  |
| **WOMEN** | **P (10)** | **P (25)** | **P (50)** | **P (75)** | **P (90)** | **Mean (SD)** |
| BMI (kg.m-2) | 21.0 | 22.6 | 25.2 | 28.4 | 32.2 | 26.0 (4.7) |
| WC (m)*100 | 69.0 | 74.0 | 82.0 | 91.0 | 100.5 | 83.5 (12.6) |
| WHR | 0.73 | 0.77 | 0.82 | 0.87 | 0.92 | 0.82 (0.08) |
| BSI (m11/6.kg-2/3)*1000 | 67.2 | 69.8 | 73.1 | 77.0 | 81.2 | 73.8 (5.8) |
| WWI (m.kg-2)*100 | 8.7 | 9.1 | 9.7 | 10.4 | 11.1 | 9.8 (0.9) |
| BRI | 1.8 | 2.3 | 3.2 | 4.4 | 5.8 | 3.5 (1.6) |
| RFM | 27.0 | 30.4 | 35.1 | 39.8 | 43.5 | 35.2 (6.2) |

Abbreviations: BMI, body-mass index; BRI, body roundness index; BSI, body shape index; RFM, relative fat mass; WC, waist circumference; WHR, waist-to-hip ratio; WWI, weight-adjusted-waist index.

**Supplementary Table 2. Correlation of standardized adiposity indices with each other and with age**

**MEN**

**WOMEN**

Abbreviations same as in Table S1.

**Supplementary Table 3. Sensitivity analysis 1: associations of adiposity indices with incident heart failure**

|  | Multivariable adjusted | | Sex-interaction | |
| --- | --- | --- | --- | --- |
|  | **HR (95% CI)** | ***P*-value** | **HRint (95% CI)** | ***P*int-value** |
| BMI | 1.25 (1.12, 1.39) | <0.001 | 0.87 (0.71, 1.07) | 0.194 |
| WC | 1.31 (1.16, 1.49) | <0.001 | 0.87 (0.68, 1.10) | 0.244 |
| WHR | 1.39 (1.21, 1.61) | <0.001 | 0.85 (0.64, 1.13) | 0.270 |
|  |  |  |  |  |
| BSI | 1.18 (1.03, 1.35) | 0.016 | 0.93 (0.72, 1.21) | 0.605 |
| WWI | 1.33 (1.16, 1.51) | <0.001 | 0.90 (0.70, 1.14) | 0.375 |
| BRI | 1.33 (1.19, 1.48) | <0.001 | 0.88 (0.71, 1.08) | 0.206 |
| RFM | 1.61 (1.32, 1.96) | <0.001 | 0.79 (0.55, 1.14) | 0.204 |

Multivariable models were adjusted for age, sex, smoking, cholesterol, **hypertension, diabetes,** and history of myocardial infarction, stroke and atrial fibrillation. HR represents the hazard ratio per standard deviation change in adiposity index; CI represents confidence interval; Pint represents the P-value for sex*covariate interaction. A hazard ratio for interaction (HRint) > 1 indicates stronger associations in women. A HRint < 1 indicates stronger associations in men. Abbreviations: BMI, body-mass index; BRI, body roundness index; BSI, body shape index; HF, heart failure; RFM, relative fat mass; WC, waist circumference; WHR, waist-to-hip ratio; WWI, weight-adjusted-waist index.

**Supplementary Table 4. Sensitivity analysis 2: associations of adiposity indices with incident heart failure after accounting for death as a competing risk**

|  | Multivariable adjusted | | Sex-interaction | |
| --- | --- | --- | --- | --- |
|  | **sHR (95% CI)** | ***P*-value** | **sHRint (95% CI)** | ***P*int-value** |
| BMI | 1.29 (1.16, 1.44) | <0.001 | 0.87 (0.71, 1.07) | 0.192 |
| WC | 1.36 (1.20, 1.54) | <0.001 | 0.90 (0.71, 1.15) | 0.414 |
| WHR | 1.41 (1.22, 1.63) | <0.001 | 0.92 (0.70, 1.21) | 0.543 |
|  |  |  |  |  |
| BSI | 1.16 (1.02, 1.33) | 0.027 | 0.99 (0.76, 1.26) | 0.924 |
| WWI | 1.32 (1.16, 1.51) | <0.001 | 0.94 (0.74, 1.19) | 0.593 |
| BRI | 1.35 (1.21, 1.50) | <0.001 | 0.90 (0.74, 1.10) | 0.313 |
| RFM | 1.68 (1.38, 2.05) | <0.001 | 0.81 (0.56, 1.18) | 0.272 |

Multivariable models accounted for death as a competing risk, and were adjusted for age, sex, smoking, cholesterol,systolic blood pressure, glucose, and history of myocardial infarction, stroke and atrial fibrillation. HR represents the hazard ratio per standard deviation change in adiposity index; CI represents confidence interval; Pint represents the P-value for sex*covariate interaction. A hazard ratio for interaction (HRint) > 1 indicates stronger associations in women. A HRint < 1 indicates stronger associations in men. Abbreviations: BMI, body-mass index; BRI, body roundness index; BSI, body shape index; HF, heart failure; RFM, relative fat mass; WC, waist circumference; WHR, waist-to-hip ratio; WWI, weight-adjusted-waist index.

**Supplementary Table 5. Associations of adiposity indices with incident heart failure after adjusting for**

**body-mass index**

|  | **HR (95% CI)** | **P-value** |
| --- | --- | --- |
| **WC** | 1.24 (1.00, 1.55) | 0.053 |
| **WHR** | 1.31 (1.11, 1.53) | 0.001 |
| **BSI** | 1.18 (1.03, 1.36) | 0.015 |
| **WWI** | 1.23 (1.07, 1.43) | 0.004 |
| **BRI** | 1.37 (1.11, 1.70) | 0.003 |
| **RFM** | 1.49 (1.12, 2.25) | 0.009 |

Abbreviations same as in Table S1.

**Supplementary Figure 1. Multivariable fractional polynomial models depicting associations of**

**novel adiposity indices with incident heart failure**

**
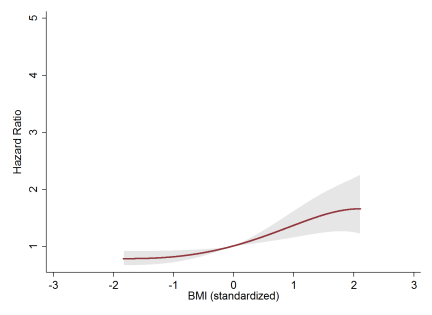

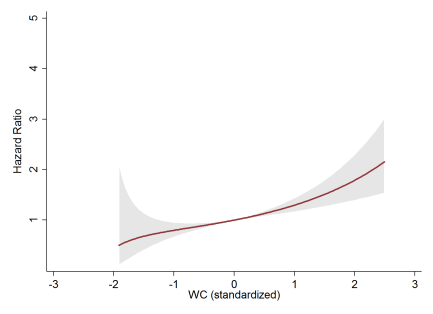

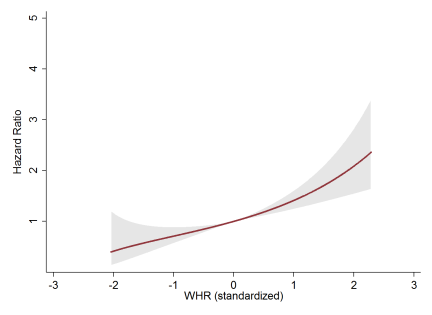
**

**
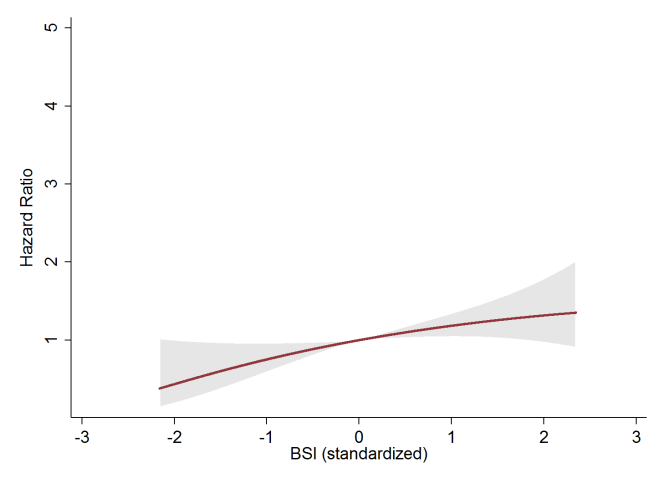

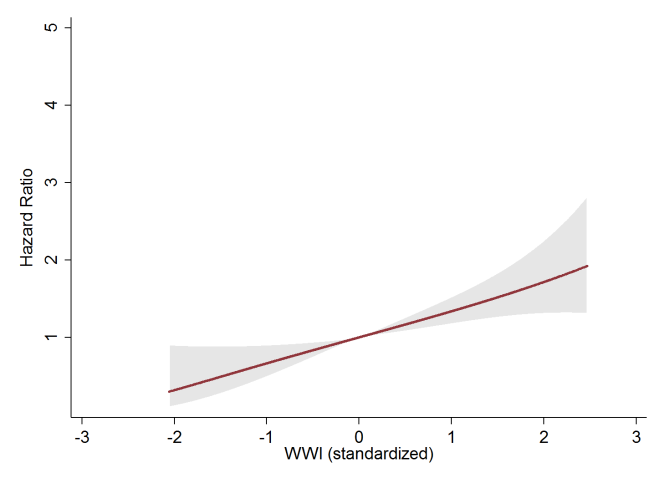
**

**
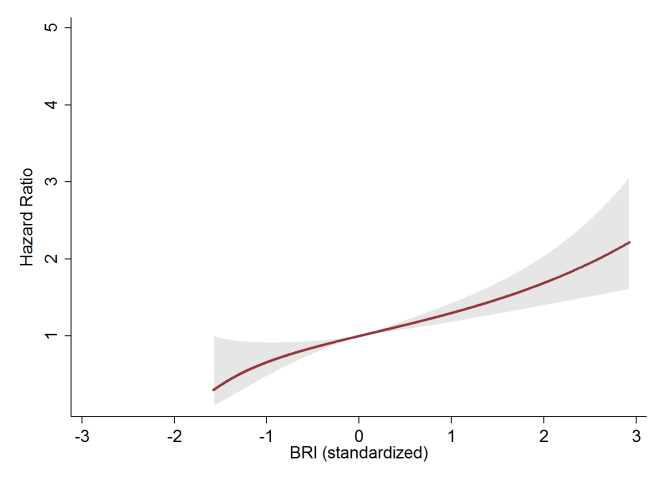

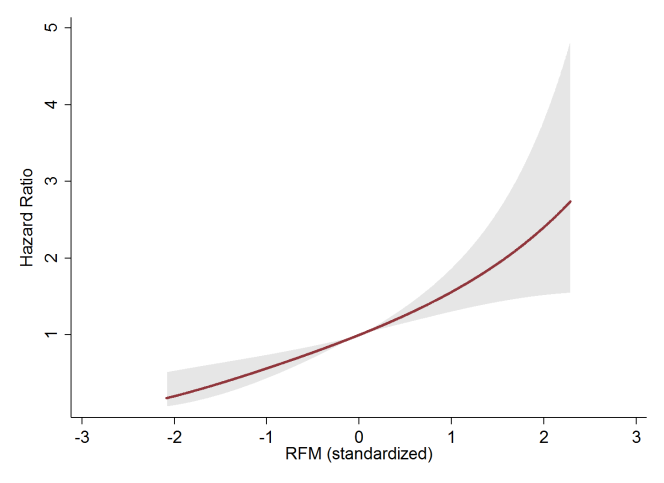
**

Fractional polynomial models are adjusted for age, sex, smoking, cholesterol, systolic blood pressure, glucose, and history of myocardial infarction, stroke and atrial fibrillation. All adiposity indices were standardized by transforming them to z-scores. Abbreviations: BMI, body-mass index; BRI, body roundness index; BSI, body shape index; RFM, relative fat mass; WC, waist circumference; WHR, waist-to-hip ratio; WWI, weight-adjusted-waist index.

**Supplementary Figure 2**

**A. Associations of adiposity indices across age categories**

**B. Associations of adiposity indices across body-mass index categories**

Abbreviations same as in Figure S2.
